# Supplementary material
Source: publisher site journal article supplement (https://www.dovepress.com/get_supplementary_file.php?f=213690.xlsx)
Supplement: Supplementary file 1 [file get_supplementary_file.php]

## Sheet: Sheet1
Table S1. DNA Oligos of primers
Gene	primer sequence
GAS5	Forward primer	AACTTGCCTGGACCAGCTTA
	reverse primer	CAAGCCGACTCTCCATACCT
bcl2	Forward primer	GATTCACTGGGTAAGACTAAAGGA
	reverse primer	AGACATCAGCATGGCTCAAAG
BAX	Forward primer	GGACGAACTGGACAGTAACATGGAGC
	reverse primer	GATGGTGAGTGAGGCGGTGAGC
CDK4	Forward primer	TCTACAGCTACCAGATGGCACTTACA
	reverse primer	AGGCAGCCCAATCAGGTCAAA
CDK6	Forward primer	TCTTCATTCACACCGAGTAGTGC
	reverse primer	TGAGGTTAGAGCCATCTGGAAA
hsa-miR-21	Forward primer	gcagtagcttatcagactgatg
	reverse primer	ggtccagtttttttttttttttcaac
